# Supplementary material
Source: PubMed Central journal article supplement (PMC4130735)
Supplement: cbt-15-1423-s01.pdf [file cbt-15-1423-s01.pdf]

## **Supplemental Material to:**

**Yuxian Song, Huan Dou, Ping Wang, Shuli Zhao,  
Tingting Wang, Wei Gong, Junli Zhao, Erguang Li,  
Ranxiang Tan, and Yayi Hou**

**A novel small-molecule compound diaporine A  
inhibits non-small cell lung cancer growth  
by regulating miR-99a/mTOR signaling**

**Cancer Biology & Therapy 2014; 15(10)**

**<http://dx.doi.org/10.4161/cbt.29925>**

**<http://www.landesbioscience.com/journals/cbt/article/29925/>**

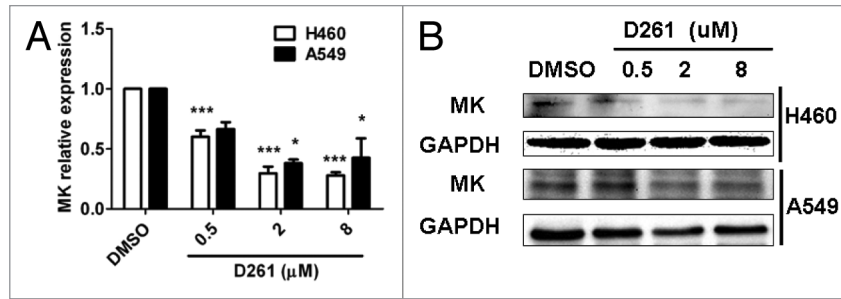

**Figure S1.** D261 inhibits MK production in vitro. NCI-H460 or A549 cells were treated with various concentrations of D261. **(A)** MK RNA levels (D261 treated for 24 h) were detected by qRT-PCR. Data are shown as mean  $\pm$  SEM ( $n = 3$ ) of one representative experiment. Similar results were obtained in at least three independent experiments. \* $P < 0.05$ , \*\*\* $P < 0.001$  compared to DMSO control. **(B)** MK protein levels (D261 treated for 48 h) were detected by western blot.

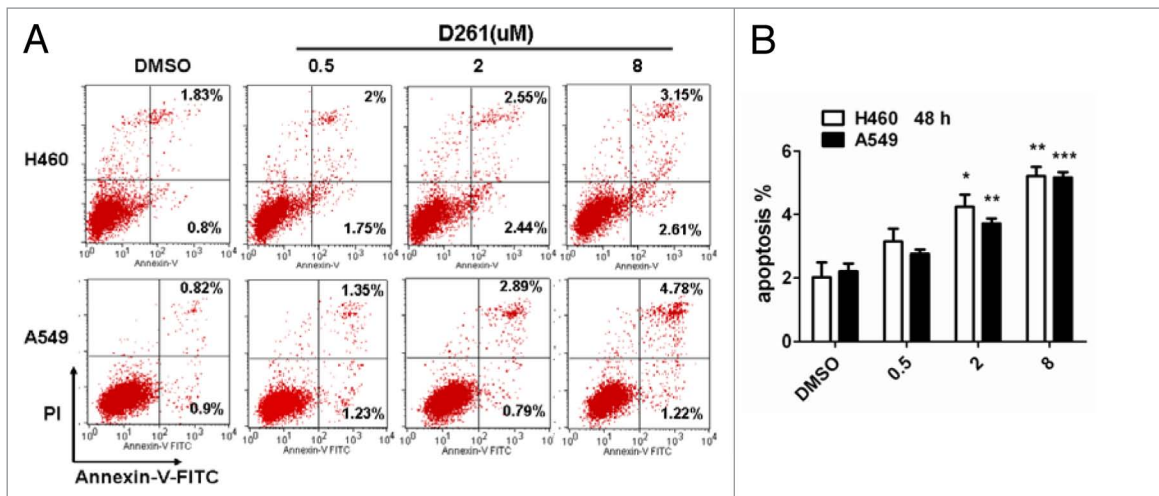

**Figure S2.** Effects of D261 on cell apoptosis. **(A)** NCI-H460 or A549 cells were treated with various concentrations of D261 for 48 h, cell apoptosis was determined by Annexin V-FITC/PI staining. **(B)** Data are shown as mean  $\pm$  SEM of three independent experiments. \* $P < 0.05$ , \*\* $P < 0.01$ , \*\*\* $P < 0.001$  compared to each DMSO control.

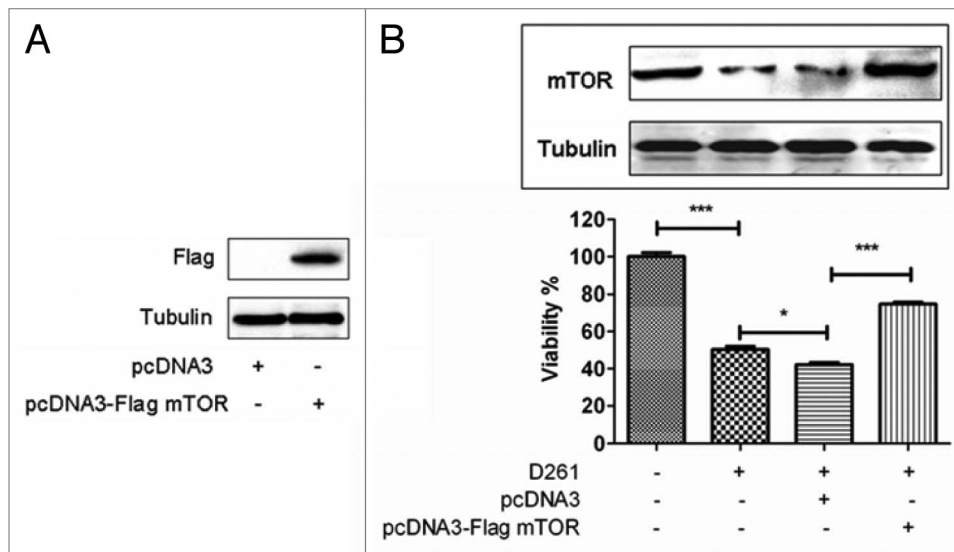

**Figure S3.** Overexpression of activated mTOR rescued D261-induced inhibition of cell growth. **(A)** A549 cells were transfected with pcDNA3-Flag mTOR or vehicle plasmid pcDNA3 for 72 h. Expression of Flag was detected by western blot. Tubulin was performed as a loading control. **(B)** A549 cells were transfected with pcDNA3-Flag mTOR or vehicle plasmid pcDNA3 24 h before treated with D261 (4 μM) for another 48 h. Expression of mTOR was detected by western blot. Cell viability was assessed using CCK-8 assay. The bars indicate mean  $\pm$  SEM ( $n = 5$ ). \* $P < 0.05$ , \*\*\* $P < 0.001$ .
